# Supplementary material
Source: PubMed Central journal article supplement (PMC4030774)
Supplement: supp_ddu029_ddu029supp.pdf [file supp_ddu029_ddu029supp.pdf]

## Supplementary Figure legends

**Fig S1. Schematic outline of nNOS,  $\Delta$ PDZ nNOS and AAV. $\Delta$ PDZ nNOS structure.** **A,** Functional domains of full-length nNOS and  $\Delta$ PDZ nNOS. The PDZ domain is located at the N-terminus of nNOS and it comprises the region of residues 1-226. The region of residues 228-244 is the domain for the protein inhibitor of NOS (PIN). The oxygenase domain binds heme and tetrahydrobiopterin (BH<sub>4</sub>) while the reductase domain binds flavin adenine mononucleotide (FMN), flavin adenine dinucleotide (FAD), and NADPH. The calmodulin-binding site (CaM) connects the oxygenase domain to the reductase domain. In  $\Delta$ PDZ nNOS, residues 1-226 were deleted. **B,** Configuration of AAV. $\Delta$ PDZ nNOS. The Flag tag is fused to the N-terminus of  $\Delta$ PDZ nNOS. The expression of Flag- $\Delta$ PDZ nNOS is driven by the muscle specific SPc5-12 promoter. The size of the vector genome is about 4.6 kb.

**Fig S2. Homogenous cytosolic expression of  $\Delta$ PDZ nNOS in the cardiomyocytes.** Serial sections of AAV. $\Delta$ PDZ nNOS-treated mdx heart were examined by double immunofluorescence staining. The panels are (from top to bottom) nNOS and Flag, nNOS and  $\alpha$ -actinin, nNOS and phospholamban, and nNOS and cytochrome C. The images from the same row were obtained from the same field but taken with different emission light to view Alex Fluoro 488 (nNOS), Fluoro 594 (Flag,  $\alpha$ -actinin, phospholamban or cytochrome C) and DAPI staining. PLN, phospholamban; Cyt C, cytochrome C. Arrows indicate the same cardiomyocyte in serial sections (scale bar: 50  $\mu$ m).

**Fig S3. Immunoblot analysis of selected calcium regulating proteins.** Representative immunoblot results for SERCA2a, RyR2, Calsequestrin and Na<sup>+</sup>/K<sup>+</sup> ATPase. GAPDH serves as the loading control.

# Fig. S1

## A

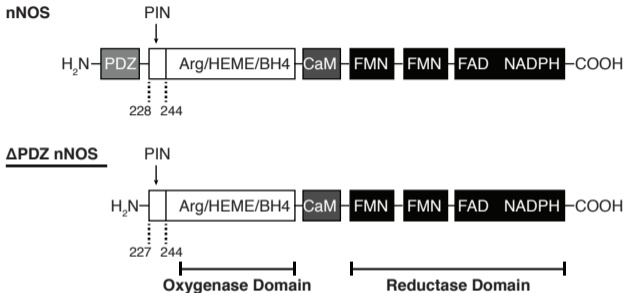

## B

**AAV.ΔPDZ nNOS**

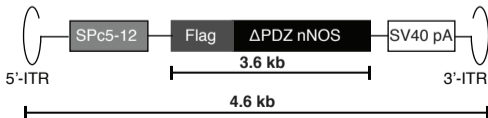

**Fig. S2**

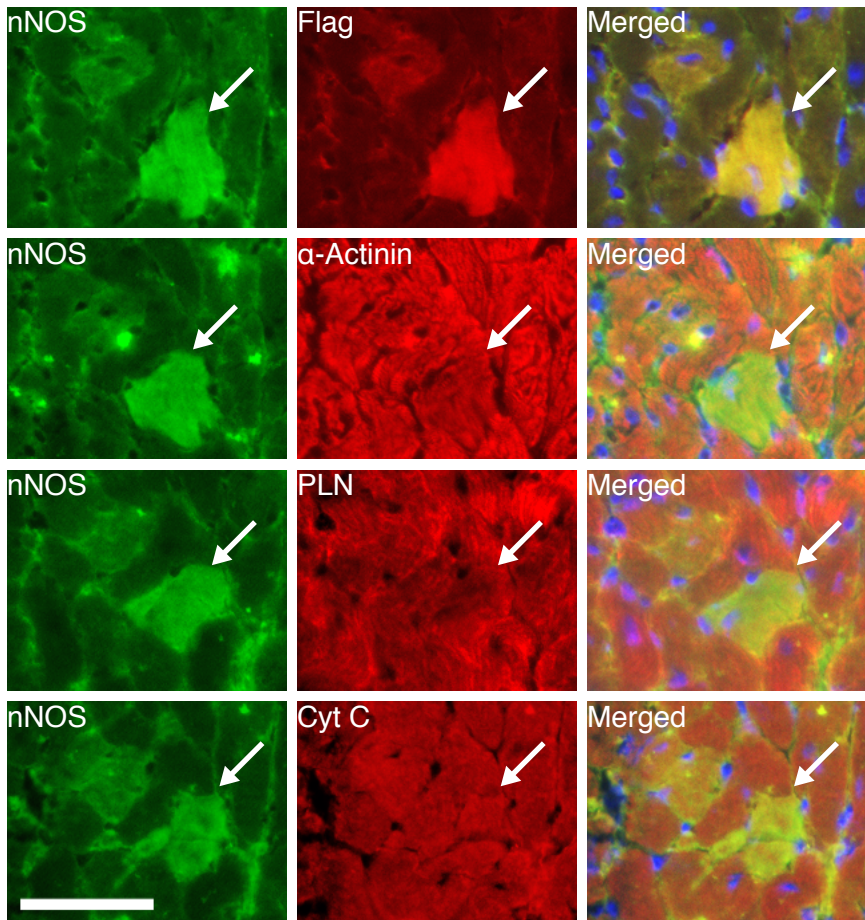

**Fig. S3**

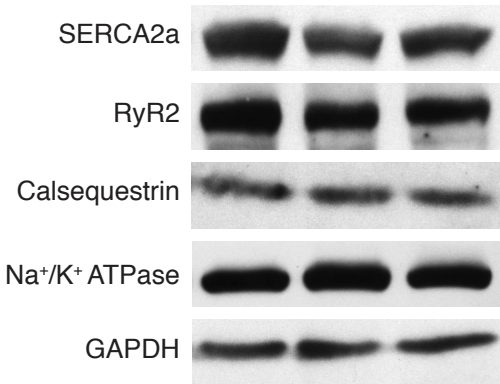

**Table S1. ECG data**

|              | BL10 (n=11)  | Mdx (n=12)  | Mdx.AAV (n=9) | P Value |
|--------------|--------------|-------------|---------------|---------|
| Age (months) | 22±0.7       | 22±0.5      | 20.1±0.8      | 0.1272  |
| HR (BPM)     | 616.3±7.3    | 654.6±7.5   | 592.8±13.04 * | 0.0002  |
| PR (ms)      | 40.22±0.92   | 33±0.52     | 38.39±1.11 *  | 0.0003  |
| QRS (ms)     | 7.66±0.11    | 9.28±0.18   | 9.11±1.03     | 0.9729  |
| QTc (ms)     | 21.46±0.39   | 29.76±1.18  | 20.54±1.2 *   | <0.0001 |
| Q Amp (μV)   | -16.24±-3.42 | -163.03±-28 | -191.2±-64.51 | 0.8518  |
| C. Index     | 0.79±0.049   | 1.63±0.15   | 0.68±0.044 *  | <0.0001 |

HR, heart rate; BPM, beat per min; QTc, heart rate-corrected QT interval; Q Amp, Q wave amplitude; C. Index, cardiomyopathy index. Asterisk, significantly different from that of untreated mdx group.

**Table S2. Results of left ventricular hemodynamic assay.**

|                         | BL10 (n=16)  | Mdx (n=13) | Mdx.AAV (n=5) | P Value |
|-------------------------|--------------|------------|---------------|---------|
| Age (months)            | 22±0.7       | 22±0.5     | 20.2±1.32     | 0.3653  |
| ESV (μl)                | 8.02±0.97    | 23.43±1.54 | 20.12±6.4     | 0.6251  |
| Max Pressure (mmHg)     | 98.17±1.69   | 59.04±5.57 | 71.44±9.29    | 0.2864  |
| dP/dt Max (kmmHg/sec)   | 11.4±0.55    | 4.91±0.64  | 9.6±1.59 *    | 0.0027  |
| EDSV (μl)               | 24.73±1.04   | 31.16±1.63 | 33.76±4.24    | 0.6715  |
| Tau (ms)                | 7.69±0.45    | 11.18±1.73 | 7.67±0.93     | 0.2568  |
| dP/dt Min (kmmHg/sec)   | -10.28±-0.32 | -4.5±-0.64 | -8.02±-1.43 * | 0.007   |
| Ejection Fraction (%)   | 72.54±2.45   | 34.65±2.15 | 51.24±12.04 * | 0.0493  |
| Stroke Volume (μl)      | 18.85±0.72   | 11.15±0.72 | 17.28±3.52 *  | 0.0126  |
| Cardiac Output (ml/min) | 10.91±0.51   | 6.44±0.43  | 10.72±1.98 *  | 0.0042  |

ESV, End systolic volume; EDSV, End diastolic volume. Asterisk, significantly different from that of the untreated mdx group.

**Table S3. Antibodies used in immunoblot.**

| <b>Antigen</b>                         | <b>Host</b> | <b>Catalog #</b> | <b>Company</b> | <b>Dilution</b> |
|----------------------------------------|-------------|------------------|----------------|-----------------|
| Akt                                    | Rabbit      | 9272             | Cell Signaling | 1:500           |
| $\alpha$ -Tubulin                      | Mouse       | T5168            | Sigma          | 1:3000          |
| Calsequestrin                          | Rabbit      | PA1-913          | Thermo         | 1:1000          |
| Dys-CT                                 | Mouse       | NCL-DYS2         | Novocastra     | 1:150           |
| eNOS                                   | Mouse       | 610296           | BD Biosciences | 1:500           |
| Flag                                   | Mouse       | F1804            | Sigma          | 1:500           |
| GAPDH                                  | Mouse       | MAB374           | Millipore      | 1:5000          |
| iNOS                                   | Rabbit      | 610332           | BD Biosciences | 1:1000          |
| mTOR                                   | Rabbit      | 2983             | Cell Signaling | 1:500           |
| Na <sup>+</sup> /K <sup>+</sup> ATPase | Mouse       | ab7671           | Abcam          | 1:10000         |
| nNOS-CT                                | Rabbit      | sc-648           | Santa Cruz     | 1:100           |
| nNOS-NT                                | Rabbit      | 07-571           | Upstate        | 1:200           |
| p38 $\alpha$                           | Rabbit      | sc-535           | Santa Cruz     | 1:1000          |
| p70S6K                                 | Rabbit      | 2708             | Cell Signaling | 1:500           |
| P-Akt (Ser473)                         | Rabbit      | 9271             | Cell Signaling | 1:1000          |
| P-Akt (Thr308)                         | Rabbit      | 2965             | Cell Signaling | 1:1000          |

---

|                       |        |         |                      |        |
|-----------------------|--------|---------|----------------------|--------|
| PLN                   | Mouse  | A010-14 | Badrilla             | 1:1000 |
| P-mTOR (Ser2448)      | Rabbit | 2971    | Cell Signaling       | 1:500  |
| P-p38 (Thr180/Thr182) | Rabbit | 9211    | Cell signaling       | 1:200  |
| P-p70S6K (Thr389)     | Rabbit | 9234    | Cell Signaling       | 1:1000 |
| P-PLN (Ser16)         | Rabbit | A010-12 | Badrilla             | 1:2500 |
| RyR2                  | Mouse  | MA3-925 | Affinity Bioreagents | 1:200  |
| SERCA2a               | Rabbit | A010-20 | Badrilla             | 1:5000 |
| Utrophin              | Mouse  | 610896  | BD Biosciences       | 1:200  |

---

CT, C terminus; NT, N terminus; Dys, dystrophin; PLN, phospholamban; P, phosphorylated; RyR, ryanodine receptor.
